# Supplementary material
Source: MDPI journal article supplement (https://www.mdpi.com/2072-4292/14/16/4118)
Supplement: s1 [file s1]

Archive with 2 entries (2 files):
- SUPPLEMENTARY-S1_Fieldwork_protocol.pdf
- SUPPLEMENTARY-S2_Analysis_output.pdf
